# Supplementary material for: Innovation Inspired by Nature: Applications of Biomimicry in Engineering Design
Source: MDPI journal article supplement (doi:10.3390/biomimetics9090523), 2024-08-30
Supplement: s1 [file s1]

| Group                      | Sub-group                       | Function                                    | Examples            |
|----------------------------|---------------------------------|---------------------------------------------|---------------------|
| Move or stay put           | Attach                          | Permanently                                 | [1]                 |
|                            |                                 | Temporarily                                 | [2,3]               |
|                            | Move                            | In/on solids                                | [4]                 |
|                            |                                 | In/on liquids                               | [4]                 |
|                            |                                 | In/throught gases                           | [2,4–8]             |
| Protect from physical harm | Protect from living threats     | Animals                                     | [9–11]              |
|                            |                                 | Plants                                      | [9–12]              |
|                            |                                 | Fungi                                       | [10–12]             |
|                            |                                 | Microbes                                    | [10–12]             |
|                            | Protect from non-living threats | Excess liquids                              | [10,11,13–15]       |
|                            |                                 | Loss of liquids                             | [10,11,13–15]       |
|                            |                                 | Loss of gases                               | [10,11,13,14]       |
|                            |                                 | Light                                       | [10,11,13,14]       |
|                            |                                 | Temperature                                 | [10,11,13,14,16]    |
|                            |                                 | Wind                                        | [10,11,13,14]       |
|                            |                                 | Gases                                       | [10,11,13,14]       |
|                            |                                 | Dirt/solids                                 | [10,11,13,14,17]    |
|                            |                                 | Chemicals                                   | [10,11,13,14]       |
|                            |                                 | Fire                                        | [10,11,13,14]       |
|                            |                                 | Ice                                         | [10,11,13,14]       |
|                            |                                 | Nuclear radiation                           | [10,11,13,14]       |
|                            | Manage structural forces        | Shear                                       | [10,11,13–15,18,19] |
|                            |                                 | Compression                                 | [10,11,13–15,18,19] |
|                            |                                 | Thermal shock                               | [10,11,13–15,18,19] |
|                            |                                 | Impact                                      | [10,11,13–15,18,19] |
|                            |                                 | Tension                                     | [10,11,13–15,18,19] |
|                            |                                 | Turbulance                                  | [10,11,13–15,18,19] |
|                            |                                 | Mechanical wear                             | [10,11,13–15,18,19] |
|                            |                                 | Chemical wear                               | [10,11,13–15,18,19] |
|                            |                                 | Creep                                       | [10,11,13–15,18,19] |
|                            | Regulate physiol. Processes     | Cellular processes                          | [20]                |
|                            |                                 | Maintain homeostasis                        | -                   |
|                            |                                 | Reproduction or growth                      | -                   |
|                            | Prevent structural failure      | Buckling                                    | [10,11,14,16,19]    |
|                            |                                 | Deformation                                 | [10,11,14,16,19]    |
|                            |                                 | Fatigue                                     | [10,11,14,16,19]    |
|                            |                                 | Melting                                     | [10,11,14,16,19]    |
|                            |                                 | Fractue/rupture                             | [10,11,14,16,19]    |
|                            | Coordinate                      | Coordinate by self-organization             | [9,21]              |
|                            |                                 | Activities                                  | [9,21]              |
|                            |                                 | Systems                                     | [9,21]              |
| Maintain community         | Cooperate                       | Within the same species                     | [21,22]             |
|                            |                                 | Cooperate/compete between different species | [21,22]             |
|                            |                                 | Within a (eco)system                        | [21,22]             |
|                            |                                 | Cooperate/compete between (eco)systems      | [21,22]             |
|                            | Provide ecosystem services      | Manage disturbance in a community           | -                   |
|                            |                                 | Regulate hydrological flows                 | [15]                |
|                            |                                 | Polinate                                    | -                   |

|        |                                  |                                                    |                    |
|--------|----------------------------------|----------------------------------------------------|--------------------|
|        |                                  | Generate soil/renew fertility                      | -                  |
|        |                                  | Detoxification/purification of air/water/waste     | [17,20]            |
|        |                                  | Control erosion and sediment                       | [15]               |
|        |                                  | Regulate water storage                             | [15]               |
|        |                                  | Cycle nutrients                                    | [20]               |
|        |                                  | Regulate atmospheric composition                   | -                  |
|        |                                  | Regulate climate                                   | [20]               |
|        |                                  | Disperse seeds                                     |                    |
|        |                                  | Maintain biodiversity                              | [20]               |
|        |                                  | Biological control of populations, pests, diseases | [17,23]            |
|        |                                  |                                                    |                    |
|        |                                  |                                                    |                    |
| Modify | Modify physical state            | Size/shape/mass/volume                             | [24]               |
|        |                                  | Pressure                                           | [24]               |
|        |                                  | Density                                            | [24]               |
|        |                                  | Phase                                              | [24]               |
|        |                                  | Buoyancy                                           | [24]               |
|        |                                  | Light/color                                        | [13,24,25]         |
|        |                                  | Material characteristics                           | [13,24,25]         |
|        |                                  | Speed                                              | [24]               |
|        |                                  | Position                                           | [24]               |
|        | Modify chemical/electrical state | Energy state                                       | [4]                |
|        |                                  | Free radical reactivity                            | [26]               |
|        |                                  | Concentration                                      | -                  |
|        |                                  | Chemical potential                                 | [26]               |
|        |                                  | Reactivity with water                              | -                  |
|        |                                  | Oxidation state                                    | [26]               |
|        |                                  | Electric charge                                    | -                  |
|        |                                  | Conductivity                                       | [13,26]            |
|        |                                  | Surface tension                                    | [13]               |
|        |                                  | Ph                                                 | [135]              |
|        |                                  | Solubility                                         | -                  |
|        |                                  | Electron transport                                 | -                  |
|        |                                  | Chemically generate flow of electrons              | [135]              |
|        | Adapt/optimize                   | Adapt genotype                                     | [27,51]            |
|        |                                  | Adapt phenotype                                    | [27,51]            |
|        |                                  | Coevolve                                           | [51]               |
|        |                                  | Adapt behaviors                                    | [51]               |
|        |                                  | Optimize space/materials                           | [27,37,51,127,181] |
|        | Transform/convert energy         | Electrical energy                                  | [28]               |
|        |                                  | Magnetic energy                                    | -                  |
|        |                                  | Chemical energy                                    | [28]               |
|        |                                  | Mechanical energy                                  | -                  |
|        |                                  | Thermal energy                                     | [28]               |
|        |                                  | Radiant energy (light)                             | [28]               |
| Make   | Reproduce                        | Self-replicate                                     | -                  |
|        | Physically assemble              | Structure                                          | [37,135,140]       |
|        | Chemically assemble              | Polymers                                           | [20,135,140,186]   |
|        |                                  | Metal-based compounds                              | [20,135,140]       |
|        |                                  | Molecular devices                                  | [20,135,140]       |
|        |                                  | Specific stereoisomers                             | [20,135,140]       |
|        |                                  | Mineral crystals                                   | [20,135,140]       |
|        |                                  | Inorganic compounds                                | [20,135,140,186]   |
|        |                                  | Organic compounds                                  | [20,135,140,186]   |
|        |                                  | Attach a functional group                          | [20,135,140,186]   |
|        |                                  | Detach a functional group                          | [20,135,140,186]   |
|        |                                  | Catalyze making of bonds                           | [20,135,140]       |

|                                    |                                  |                                            |                 |
|------------------------------------|----------------------------------|--------------------------------------------|-----------------|
|                                    |                                  | On demand                                  | [20,135,140]    |
| Process information                | Navigate                         | Through air                                | [128]           |
|                                    |                                  | Through liquid                             | [128]           |
|                                    |                                  | Over land                                  | [128]           |
|                                    |                                  | Through solids                             | [128]           |
|                                    | Send signals                     | Light (visible spectrum)                   | [28]            |
|                                    |                                  | Light (non-visible spectrum)               | [28]            |
|                                    |                                  | Sound                                      | -               |
|                                    |                                  | Tactile                                    | -               |
|                                    |                                  | Chemical (odor, taste, etc)                | -               |
|                                    |                                  | Vibratory                                  | -               |
|                                    |                                  | Electrical/magnetic                        | -               |
|                                    | Process signals                  | Differentiate signal from noise            | [33,115,119]    |
|                                    |                                  | Transduce/convert signals                  | [33,115,119]    |
|                                    |                                  | Respond to signals                         | [27,33,115,119] |
|                                    | Sense signals/environmental cues | Light (visible spectrum)                   | [28]            |
|                                    |                                  | Light (non-visible spectrum)               | [28]            |
|                                    |                                  | Electricity/magnetism                      | -               |
|                                    |                                  | Disease                                    | -               |
|                                    |                                  | Touch and mechanical forces                | -               |
|                                    |                                  | Chemicals (odor, taste, etc.)              | [20]            |
|                                    |                                  | Atmospheric conditions                     | -               |
|                                    |                                  | Sound and other vibrations                 | -               |
|                                    |                                  | Temperature                                | -               |
|                                    |                                  | Motion                                     | [92]            |
|                                    |                                  | Pain                                       | -               |
|                                    |                                  | Body awareness                             | -               |
|                                    |                                  | Balance/orientation                        | -               |
|                                    |                                  | Shape and pattern                          | [27]            |
|                                    |                                  | Time and day length                        | -               |
|                                    | Compute/learn/[en/de]code        |                                            | -               |
| Break down                         | Chemically break down            | Cleave heavy metals from organic compounds | [20,135]        |
|                                    |                                  | Cleave halogens from organic compounds     | [20,135]        |
|                                    |                                  | Inorganic compounds                        | [20,135]        |
|                                    |                                  | Polymers                                   | [20,135]        |
|                                    |                                  | Organic compounds                          | [20,135]        |
|                                    |                                  | Catalyze making of bonds                   | [20,135]        |
|                                    | Physically break down            | Non-living materials                       | [135]           |
|                                    |                                  | Living materials                           | [135]           |
| Get, store or distribute resources | Capture, absorb, or filter       | Organisms                                  | [20,140]        |
|                                    |                                  | Solids                                     | [20,140,181]    |
|                                    |                                  | Liquids                                    | [20,140]        |
|                                    |                                  | Gasses                                     | [20,140]        |
|                                    |                                  | Energy                                     | [20,28,51,140]  |
|                                    |                                  | Chemical entities                          | [140]           |
|                                    | Store                            | Solids                                     | [140,181]       |
|                                    |                                  | Liquids                                    | [140,181]       |
|                                    |                                  | Gases                                      | [140]           |
|                                    |                                  | Energy                                     | [51,140]        |
|                                    |                                  | Chemical entities                          | [20,140]        |
|                                    | Distribute                       | Solids                                     | [140]           |
|                                    |                                  | Liquids                                    | [140]           |
|                                    |                                  | Gases                                      | [140]           |
|                                    |                                  | Energy                                     | [51,140]        |
|                                    | Expel                            | Solids                                     | -               |

|  |  |         |   |
|--|--|---------|---|
|  |  | Liquids | - |
|  |  | Gases   |   |

1. Tang, Z.; Wang, Y.; Podsiadlo, P.; Kotov, N. Biomedical Applications of Layer-by-layer Assembly: From Biomimetics to Tissue Engineering. *Wiley Online Library* **2006**, *18*, 3203–3224, doi:10.1002/adma.200600113.
2. Rolf, M.; Neumann, K.; Queißer, J.F.; Reinhart, R.F.; Nordmann, A.; Steil, J.J. A Multi-Level Control Architecture for the Bionic Handling Assistant. *Taylor & Francis* **2015**, *00*, 1–15.
3. León, H.; Gama-Campillo, A.; Catillo, E.; Ortiz, H. Innovación En El Diseño Biomimético de Robots Available online: [https://scholar.google.es/scholar?hl=es&as\\_sdt=0%2C5&q=Innovaci%C3%B3n+en+el+Dise%C3%B1o+Biomim%C3%A9tico+de+robots+Hexapodos+y+Cudrupedos.&btnG=](https://scholar.google.es/scholar?hl=es&as_sdt=0%2C5&q=Innovaci%C3%B3n+en+el+Dise%C3%B1o+Biomim%C3%A9tico+de+robots+Hexapodos+y+Cudrupedos.&btnG=) (accessed on 17 May 2023).
4. Carpi, F.; Erb, R.; Jeronimidis, G. Special Section on Biomimetics of Movement. *iopscience.iop.org* **2011**.
5. Billard, A.; Matarić, M. Learning Human Arm Movements by Imitation: Evaluation of a Biologically Inspired Connectionist Architecture. *Elsevier* **2001**, *941*, 1–16.
6. Low, K.; Hu, T.; Mohammed, S. Perspectives on Biologically Inspired Hybrid and Multi-Modal Locomotion. *iopscience.iop.org* **2015**.
7. Siddall, R.; Biomimetics, B.& Low, K.H.; Hu, T.; Mohammed, S. Launching the AquaMAV: Bioinspired Design for Aerial–Aquatic Robotic Platforms. *iopscience.iop.org* **2014**, doi:10.1088/1748-3182/9/3/031001.
8. Bogue, R. Bioinspired Designs Impart Robots with Unique Capabilities. *Industrial Robot* **2019**, *46*, 561–567, doi:10.1108/IR-05-2019-0100/FULL/HTML.
9. Ren, L.; Li, B.; Wei, G.; Wang, K.; Song, Z.; Wei, Y.; Iscience, L.R. Biology and Bioinspiration of Soft Robotics: Actuation, Sensing, and System Integration. *Elsevier* **2021**.
10. Gebeshuber, I.C.; Stachelberger, H.; Ganji, A.; Fu, D.C.; Yunas, J.; Majlis, B.Y. Exploring the Innovational Potential of Biomimetics for Novel 3D MEMS. **2009**, doi:10.4028/www.scientific.net/AMR.74.265.
11. Cadman, J.; Zhou, S.; Chen, Y.; Engineering, Q.L.-J. of B.; 2012, undefined Cuttlebone: Characterisation, Application and Development of Biomimetic Materials. *Springer* **2012**, *9*, 367–376, doi:10.1016/S1672-6529(11)60132-7.
12. Yan, H.; Wu, Q.; Yu, C.; Zhao, T.; Liu, M. Recent Progress of Biomimetic Antifouling Surfaces in Marine. *Adv Mater Interfaces* **2020**, *7*, doi:10.1002/ADMI.202000966.
13. Xia, F.; Jiang, L. Bio-inspired, Smart, Multiscale Interfacial Materials. *Wiley Online Library* **2008**, *20*, 2842–2858, doi:10.1002/adma.200800836.
14. Rezaei, D.; Zare, M. Plants in Arid Climate as a Pattern for Bionic Architecture in Behavioral Viewpoint Available online: [https://www.researchgate.net/publication/316352839\\_Plants\\_in\\_arid\\_climate\\_as\\_a\\_pattern\\_for\\_bionic\\_architecture\\_in\\_behavioral\\_viewpoint](https://www.researchgate.net/publication/316352839_Plants_in_arid_climate_as_a_pattern_for_bionic_architecture_in_behavioral_viewpoint) (accessed on 15 May 2023).

15. Kenny, J.; Kumar, A.; Kiran, C. Exploring a Biomimicry Based Approach and Key Barriers to Evolving Water Infrastructure Systems Available online: [https://www.researchgate.net/publication/281850099\\_Exploring\\_a\\_biomimicry\\_based\\_approach\\_and\\_key\\_barriers\\_to\\_evolution\\_water\\_infrastructure\\_systems](https://www.researchgate.net/publication/281850099_Exploring_a_biomimicry_based_approach_and_key_barriers_to_evolution_water_infrastructure_systems) (accessed on 15 May 2023).
16. Milwich, M.; Speck, T.; Speck, O.; Stegmaier, T.; Planck, H. Biomimetics and Technical Textiles: Solving Engineering Problems with the Help of Nature's Wisdom. *Wiley Online Library* **2006**, *93*, 1455–1465, doi:10.3732/ajb.93.10.1455.
17. Schroeder, A.; Marshall, L.; Trease, B. Development of Helical, Fish-Inspired Cross-Step Filter for Collecting Harmful Algae. *iopscience.iop.org* **2019**.
18. Qi Wang, R. Learn from Reptiles: A Model of Bionic Architecture | BioBuild Program Available online: <https://biobuild.mlsoc.vt.edu/blog/learn-reptiles-model-bionic-architecture> (accessed on 15 May 2023).
19. Biology, S.R. Search the Structures of Bionic Principles for Designing Tensegrity Structures. *aensiweb.net* **2014**, *8*, 714–721.
20. García-Serna, J.; Pérez-Barrigón, L.; Cocero, M. New Trends for Design towards Sustainability in Chemical Engineering: Green Engineering. *Elsevier* **2007**.
21. Krzemińska, A.E.; Zaręba, A.D.; Dzikowska, A.; Jarosz, K.R. Cities of the Future—Bionic Systems of New Urban Environment. *Environmental Science and Pollution Research* **2019**, *26*, 8362–8370, doi:10.1007/S11356-017-0885-2.
22. Pfeifer, R.; Lungarella, M.; Iida, F. Self-Organization, Embodiment, and Biologically Inspired Robotics. *Science (1979)* **2007**, *318*, 1088–1093, doi:10.1126/SCIENCE.1145803.
23. Solga, A.; Cerman, Z.; Striffler, B.F.; Spaeth, M.; Barthlott, W. The Dream of Staying Clean: Lotus and Biomimetic Surfaces. *iopscience.iop.org* **2007**, *2*, 126–134, doi:10.1088/1748-3182/2/4/S02.
24. Clegg, J.; Wagner, A.; Shin, S.; ... S.H. Modular Fabrication of Intelligent Material-Tissue Interfaces for Bioinspired and Biomimetic Devices. *Elsevier* **2019**.
25. Saito, A. Material Design and Structural Color Inspired by Biomimetic Approach. *Sci Technol Adv Mater* **2011**, *12*, 064709, doi:10.1088/1468-6996/12/6/064709.
26. Li, B.; Haynie, D. Multilayer Biomimetics: Reversible Covalent Stabilization of a Nanostructured Biofilm. *ACS Publications* **2004**, *5*, 1667–1670, doi:10.1021/bm0496155.
27. Shah, D.; Yang, B.; Kriegman, S.; Levin, M.; Bongard, J.; Kramer-Bottiglio, R. Shape Changing Robots: Bioinspiration, Simulation, and Physical Realization. *Wiley Online Library* **2021**, *33*, doi:10.1002/adma.202002882.
28. RANT, D.; PAVKO-ČUDEN, A. SELF-FOLDABLE KNITTED BAGS FOR HOUSEHOLD STORAGE OF BAKERY PRODUCTS BASED ON BIOMIMETICS. *bib.irb.hr* **2018**.
29. Malfaz, M.; Castro, Á.; Barber, R.; Salichs, M.A. A Biologically Inspired Architecture for an Autonomous and Social Robot. *IEEE Trans Auton Ment Dev* **2011**, *3*, 232–246, doi:10.1109/TAMD.2011.2112766.

30. Jacobsen, R.; Zhang, Q.; Toftegaard, T. Bioinspired Principles for Large-Scale Networked Sensor Systems: An Overview. *mdpi.com* **2011**, *11*, 4137–4151, doi:10.3390/s110404137.
31. Valle, M. Bioinspired Sensor Systems. *Sensors* **2011**, *Vol. 11*, Pages 10180-10186 **2011**, *11*, 10180–10186, doi:10.3390/S111110180.
